# Supplementary material
Source: PubMed Central journal article supplement (PMC4325106)
Supplement: JB.02279-14_zjb999093507so1.pdf [file JB.02279-14_zjb999093507so1.pdf]

## **Episomal F TraR activates the $\sigma^E$ -dependent stress pathway to anticipate conjugational stress**

Elicia D. Grace<sup>1,2</sup>, Saumya Gopalkrishnan<sup>3</sup>, Mary E. Girard<sup>2</sup>, Matthew D. Blankschien<sup>1</sup>, Wilma Ross<sup>3</sup>, Richard L. Gourse<sup>3</sup>, and Christophe Herman<sup>1,2,\*</sup>

Department of Molecular and Human Genetics<sup>1</sup>, Department of Molecular Virology and Microbiology<sup>2</sup>, Baylor College of Medicine, Houston, TX 77030, USA; Department of Bacteriology<sup>3</sup>, University of Wisconsin-Madison, Madison, WI 53706

\* Correspondence: [herman@bcm.edu](mailto:herman@bcm.edu) or Tel. 713-798-2126

## Supplemental – Strain Table

| Name                        | Genotype or Relevant Genotype                                                                                                                                                                                                                                        | Reference or Source                |
|-----------------------------|----------------------------------------------------------------------------------------------------------------------------------------------------------------------------------------------------------------------------------------------------------------------|------------------------------------|
| <b>Plasmids</b>             |                                                                                                                                                                                                                                                                      |                                    |
| pR1                         | Amp <sup>R</sup> Km <sup>R</sup> Cm <sup>R</sup>                                                                                                                                                                                                                     | O. Garcia (Pasteur)                |
| pR1 <i>drd19</i>            | Amp <sup>r</sup> Km <sup>r</sup> Cm <sup>r</sup> Sm <sup>r</sup> IncFII <i>finO</i>                                                                                                                                                                                  | O. Garcia (Pasteur)                |
| pControl                    | pBA169 Amp <sup>R</sup>                                                                                                                                                                                                                                              | (1)                                |
| pDksA                       | pBA169/ <i>dksA</i> Amp <sup>R</sup>                                                                                                                                                                                                                                 | (2)                                |
| pTraR                       | pBA169/ <i>traR</i> Amp <sup>R</sup>                                                                                                                                                                                                                                 | (2)                                |
| pOX38                       | IncFI, <i>tra</i> <sup>+</sup> <i>finO</i> <sup>-</sup> , RepFIA <sup>+</sup> , f1 <i>HindIII</i> fragment of F'                                                                                                                                                     | (3)                                |
| F'                          | pOX38 Km <sup>R</sup>                                                                                                                                                                                                                                                | (2)                                |
| F' $\Delta$ <i>traR</i>     | pOX38 $\Delta$ <i>traR</i> ::FRT Km <sup>R</sup>                                                                                                                                                                                                                     | (2)                                |
| pUA E16                     | P2 <sub><i>rpoE</i></sub> - <i>gfp-kan</i>                                                                                                                                                                                                                           | Carol Gross                        |
| pCP20                       | FLP recombinase vector                                                                                                                                                                                                                                               | (4)                                |
| pKD46                       | Vector used for linear gene replacement                                                                                                                                                                                                                              | (4)                                |
| pSEB015                     | Plasmid used for in vitro transcription Amp <sup>R</sup>                                                                                                                                                                                                             | (5)                                |
| <b>Parental strains</b>     |                                                                                                                                                                                                                                                                      |                                    |
| MG1655                      | F <sup>-</sup> $\lambda$ <sup>-</sup> <i>ilvG</i> <sup>-</sup> <i>rfb-50</i> <i>rph-1</i> , sequenced wild-type K12                                                                                                                                                  | (6)                                |
| CF9240                      | MG1655 $\Delta$ <i>dksA</i> ::Tet <sup>R</sup>                                                                                                                                                                                                                       | Michael Cashel                     |
| CAG39758                    | MG1655 $\Delta$ <i>lacI</i> Z $\lambda$ P3 <sub><i>rpoH</i></sub> - <i>lacZ</i>                                                                                                                                                                                      | (7)                                |
| MC1061                      | <i>araD139</i> $\Delta$ ( <i>araA-leu</i> )7697 $\Delta$ <i>lacX74</i> <i>galK16</i> <i>galE15</i> ( <i>galS</i> )<br>$\lambda$ <sup>-</sup> <i>e14</i> <sup>-</sup> <i>mcrA0</i> <i>relA1</i> <i>rpsL150</i> ( <i>strR</i> ) <i>spoT1</i> <i>mcrB1</i> <i>hsdR2</i> |                                    |
| CAG33315                    | MC1061 $\lambda$ P3 <sub><i>rpoH</i></sub> - <i>lacZ</i> $\Delta$ <i>degS</i>                                                                                                                                                                                        | (8)                                |
| CH1385                      | MG1655 $\Delta$ <i>rseA</i> ::Tet <sup>R</sup>                                                                                                                                                                                                                       | (9)                                |
| CH1399                      | 39758 x P1 CH1385                                                                                                                                                                                                                                                    | This study                         |
| CAG55816                    | MG1655 pUA E16                                                                                                                                                                                                                                                       | Carol Gross                        |
| <b>Experimental Strains</b> |                                                                                                                                                                                                                                                                      |                                    |
| CH3060                      | MG1655 Strep <sup>R</sup> [pR1]                                                                                                                                                                                                                                      | This study                         |
| CH3061                      | MG1655 Strep <sup>R</sup> [pR1 <i>drd19</i> ]                                                                                                                                                                                                                        | This study                         |
| CH3095                      | CF9240 [pR1]                                                                                                                                                                                                                                                         | This study                         |
| CH3096                      | CF9240 [pR1 <i>drd19</i> ]                                                                                                                                                                                                                                           | This study                         |
| CH1329                      | 39758 [pTraR]                                                                                                                                                                                                                                                        | This study                         |
| CH1330                      | 39758 [pDksA]                                                                                                                                                                                                                                                        | This study                         |
| CH1331                      | 39758 [pControl]                                                                                                                                                                                                                                                     | This study                         |
| CH1037                      | MG1655 [pTraR]                                                                                                                                                                                                                                                       | (Blankschien <i>et al.</i> , 2009) |
| CH1039                      | MG1655 [pControl]                                                                                                                                                                                                                                                    | (Blankschien <i>et al.</i> , 2009) |
| CH1474                      | CAG33315 [pTraR]                                                                                                                                                                                                                                                     | This study                         |
| CH1475                      | CAG33315 [pDksA]                                                                                                                                                                                                                                                     | This study                         |
| CH1476                      | CAG33315 [pControl]                                                                                                                                                                                                                                                  | This study                         |
| CH1410                      | CH1399 [pTraR]                                                                                                                                                                                                                                                       | This study                         |
| CH1411                      | CH1399 [pDksA]                                                                                                                                                                                                                                                       | This study                         |
| CH1412                      | CH1399 [pControl]                                                                                                                                                                                                                                                    | This study                         |
| CH4203                      | CAG55816 [F']                                                                                                                                                                                                                                                        | This study                         |
| CH4204                      | CAG55816 [F' $\Delta$ <i>traR</i> ]                                                                                                                                                                                                                                  | This study                         |
| CH5684                      | CAG55816 [pControl]                                                                                                                                                                                                                                                  | This study                         |
| CH5686                      | CAG55816 [pTraR]                                                                                                                                                                                                                                                     | This study                         |
| CH1018                      | MG1655 [F']                                                                                                                                                                                                                                                          | (Blankschien <i>et al.</i> , 2009) |
| CH2728                      | MG1655 [F' $\Delta$ <i>traR</i> ]                                                                                                                                                                                                                                    | (Blankschien <i>et al.</i> , 2009) |



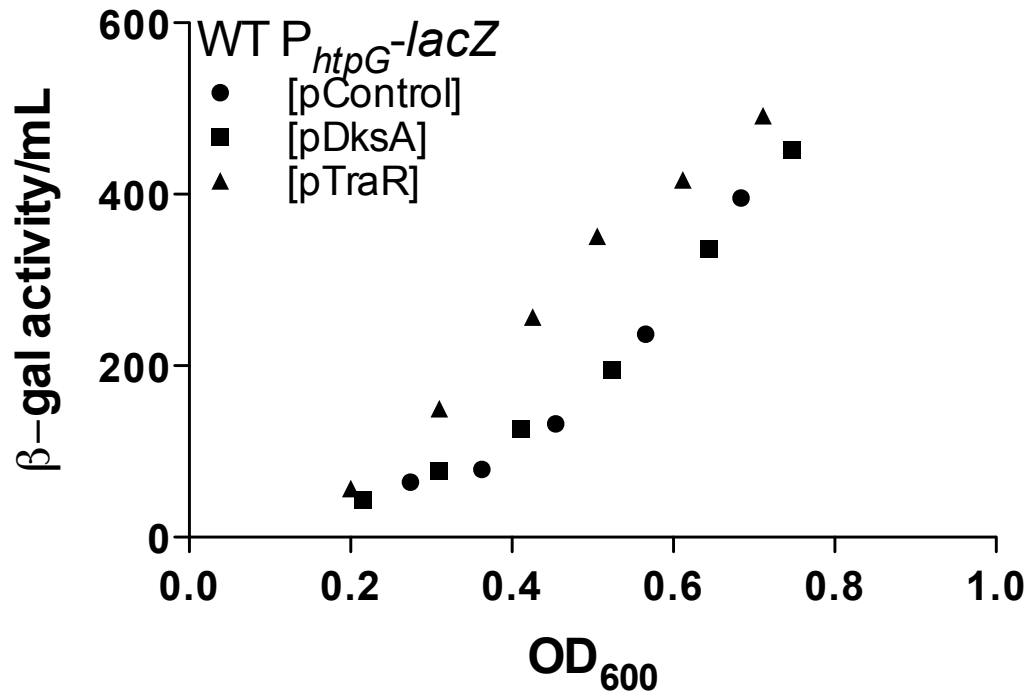

### Supplemental Figure 2

The  $\sigma^{32}$ -dependent promoter *htpG* is modestly and transiently activated by induction of TraR.

Beta-galactosidase activity of the  $P_{htpG}$ -*lacZ* promoter fusion was measured in LB at 32°C with or without TraR induction (0.1mM IPTG). The rate of  $\beta$ -gal synthesis between OD<sub>600</sub> of 0.2 and 0.4 are the following: pControl= 377.5 (R<sup>2</sup>-0.91), pDksA = 422.1 (R<sup>2</sup>-0.99), pTraR= 886.0 (R<sup>2</sup>-0.99). The rate of  $\beta$ -gal synthesis between OD<sub>600</sub> of 0.4 and 0.8 is 1071.0 for pControl (R<sup>2</sup>- 0.99), 977.8 for pDksa (R<sup>2</sup>- 0.990) and 707.8 for pTraR (R<sup>2</sup>- 0.976). Rates of beta-galactosidase activity in exponential phase, from OD<sub>600</sub> 0.2 to 0.8, are 875.1 (pControl), 804.2 (pDksA), 806.4 (pTraR). Data shown are representative of three independent experiments.

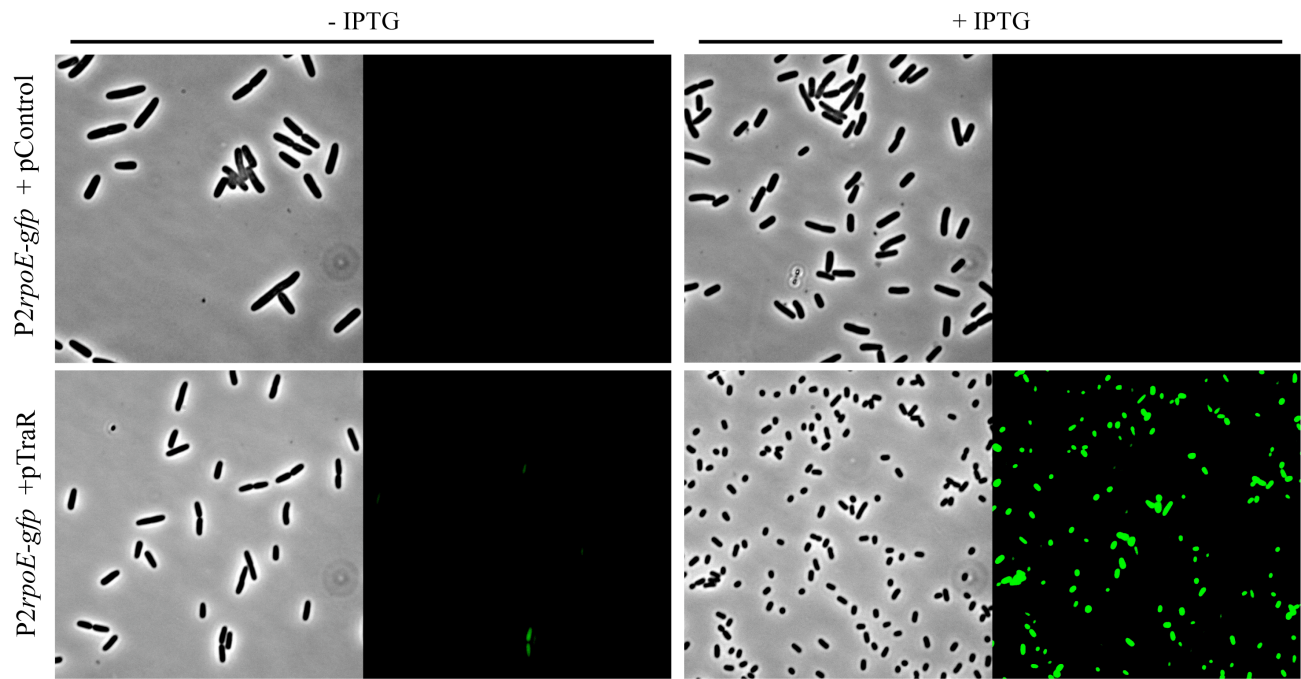

### Supplemental Figure 3

**Artificial induction of TraR alone is sufficient to increase  $\sigma^E$  activity.** Microscopy images from cultures grown at 32°C in LB and sampled at log phase ( $OD_{600}$  0.4 – 0.5) with or without IPTG, left and right respectively. Strains contain a chromosomal *P2<sub>rpoE</sub>-gfp* fusion with either pControl (bottom) or pTraR (top). Images shown are phase contrast (left) and GFP fluorescence (right) and were taken at identical light and fluorescence exposures. Data shown are representative of three independent experiments.

## Supplemental References

1. **Walsh NP, Alba BM, Bose B, Gross CA, Sauer RT.** 2003. OMP Peptide Signals Initiate the Envelope-Stress Response by Activating DegS Protease via Relief of Inhibition Mediated by Its PDZ Domain. *Cell* **113**:61–71.
2. **Blankschien MD, Potrykus K, Grace E, Choudhary A, Vinella D, Cashel M, Herman C.** 2009. TraR, a homolog of a RNAP secondary channel interactor, modulates transcription. *PLoS Genet.*, 2009/05/09 ed. **5**:e1000345.
3. **Klimke WA, Rypien CD, Klinger B, Kennedy RA, Rodriguez-Maillard JM, Frost LS.** 2005. The mating pair stabilization protein, TraN, of the F plasmid is an outer-membrane protein with two regions that are important for its function in conjugation. *Microbiology* **151**:3527–40.
4. **Datsenko KA, Wanner BL.** 2000. One-step inactivation of chromosomal genes in *Escherichia coli* K-12 using PCR products. *Proc. Natl. Acad. Sci. U. S. A.*, 2000/06/01 ed. **97**:6640–6645.
5. **Costanzo A, Nicoloff H, Barchinger SE, Banta AB, Gourse RL, Ades SE.** 2008. ppGpp and DksA likely regulate the activity of the extracytoplasmic stress factor sigmaE in *Escherichia coli* by both direct and indirect mechanisms. *Mol. Microbiol.*, 2007/12/19 ed. **67**:619–632.
6. **Blattner FR, Plunkett G, Bloch CA, Perna NT, Burland V, Riley M, Collado-Vides J, Glasner JD, Rode CK, Mayhew GF, Gregor J, Davis NW, Kirkpatrick HA, Goeden MA, Rose DJ, Mau B, Shao Y.** 1997. The complete genome sequence of *Escherichia coli* K-12. *Science* **277**:1453–62.
7. **Guisbert E, Rhodius V a, Ahuja N, Witkin E, Gross C a.** 2007. Hfq modulates the sigmaE-mediated envelope stress response and the sigma32-mediated cytoplasmic stress response in *Escherichia coli*. *J. Bacteriol.* **189**:1963–1973.
8. **Alba BM, Leeds J a, Onufryk C, Lu CZ, Gross C a.** 2002. DegS and YaeL participate sequentially in the cleavage of RseA to activate the sigma(E)-dependent extracytoplasmic stress response. *Genes Dev.* **16**:2156–2168.
9. **Baba T, Ara T, Hasegawa M, Takai Y, Okumura Y, Baba M, Datsenko KA, Tomita M, Wanner BL, Mori H.** 2006. Construction of *Escherichia coli* K-12 in-frame, single-gene knockout mutants: the Keio collection. *Mol. Syst. Biol.* **2**:2006.0008.
